# Supplementary material for: Layer-by-layer anodes with an orientation-arranged structure induced by magnetic field for high-performance lithium ion batteries
Source: Royal Society of Chemistry journal article supplement (doi:10.1039/d2se01291j), 2022-11-21
Supplement: d2se01291j1.pdf [file d2se01291j1.pdf]

## Supporting Information

### Layer-by-Layer Anodes with Orientation-arranged Structure Induced by Magnetic Field for High-performance Lithium Ion Batteries

*Qing Mei Xu<sup>§</sup>, Zhao Min Sheng<sup>§\*</sup>, Huan Huang, Cheng Kang Chang, Yan Shan Huang and Sheng Han\**

School of Materials Science and Engineering, Shanghai institute of technology, Shanghai 201418, China

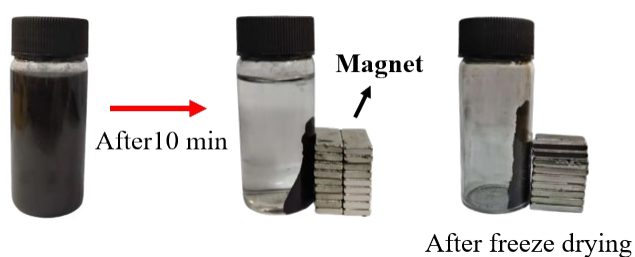

Fig. S1 Response of  $\text{Fe}_3\text{O}_4/\text{CFs}$  to the added magnet.

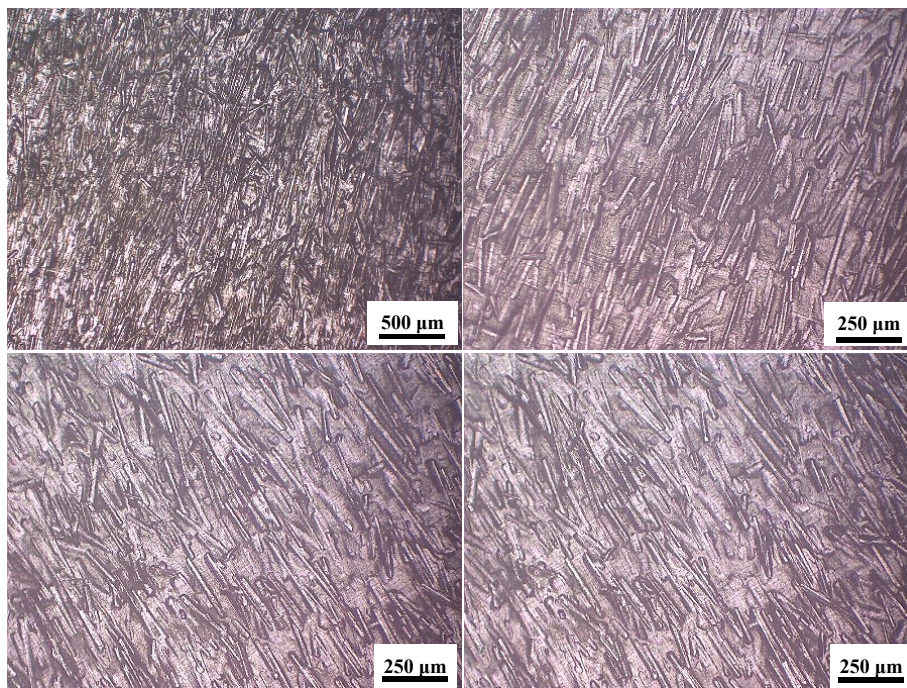

Fig. S2 Optical microscope images of the orientation-arranged  $\text{Fe}_3\text{O}_4/\text{CF}$  anodes.
